# Supplementary figures and images for: Notch1 cortical signaling regulates epithelial architecture and cell–cell adhesion
Source: PubMed Central journal article supplement — J Cell Biol. 2023 Oct 5;222(12):e202303013. doi: 10.1083/jcb.202303013 (PMC10555887; doi:10.1083/jcb.202303013), 2023-10-05

**Fig. 1A**

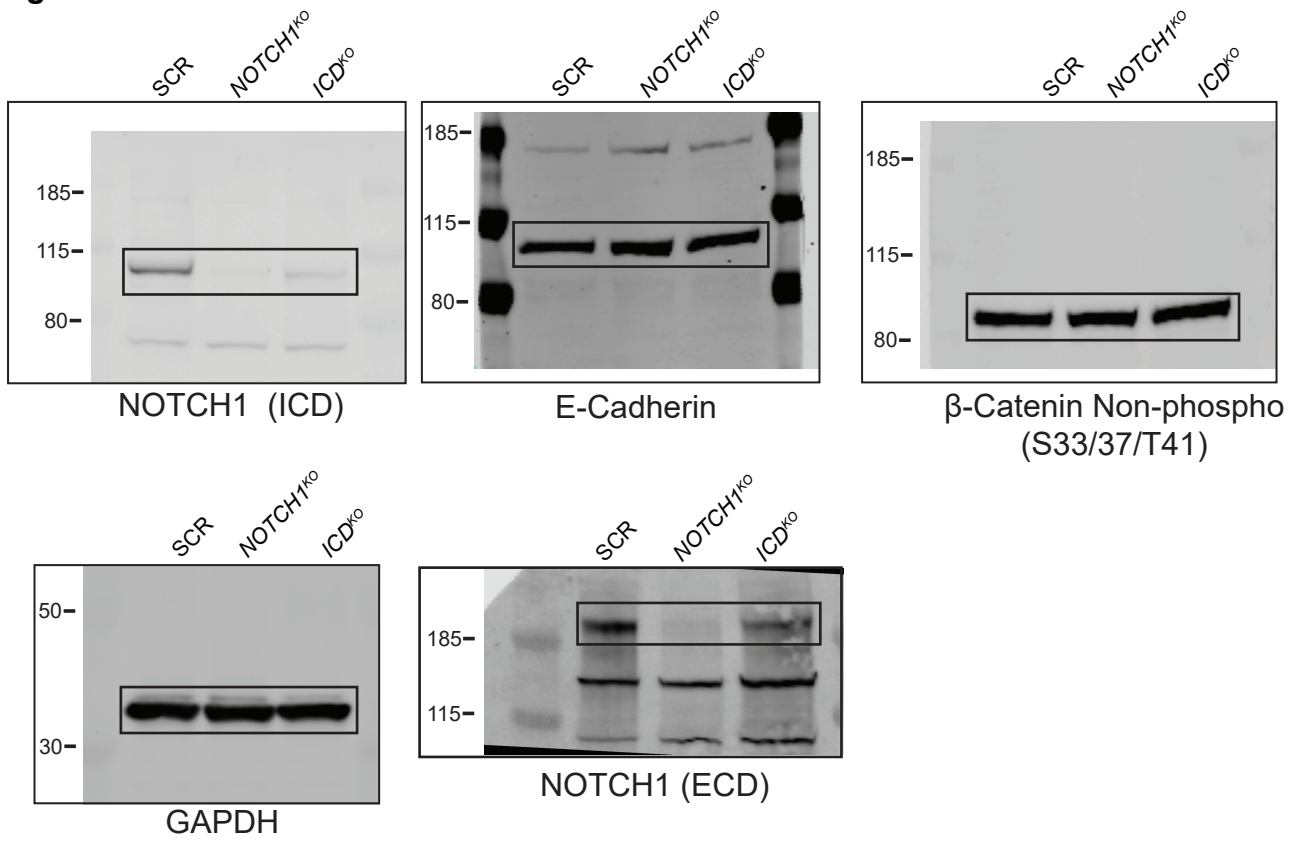

Supplement: JCB_202303013_SourceDataF1.pdf [file JCB_202303013_SourceDataF1.pdf]

**Fig. 2I**

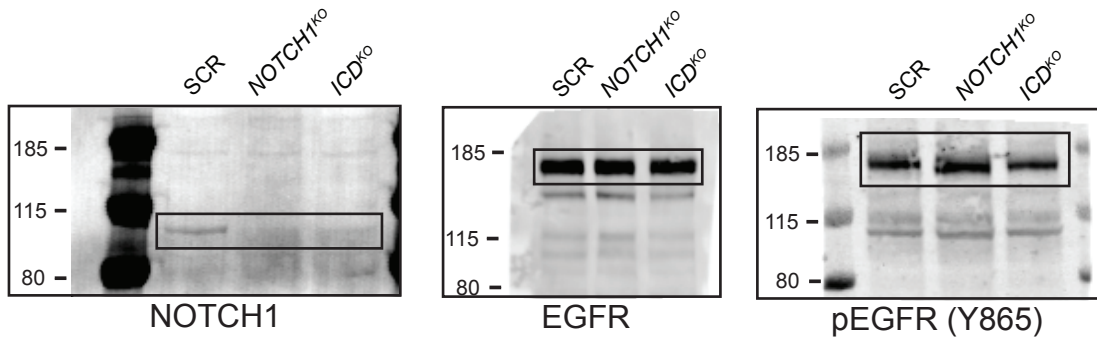

Supplement: JCB_202303013_SourceDataF2.pdf [file JCB_202303013_SourceDataF2.pdf]

**Fig. 4D**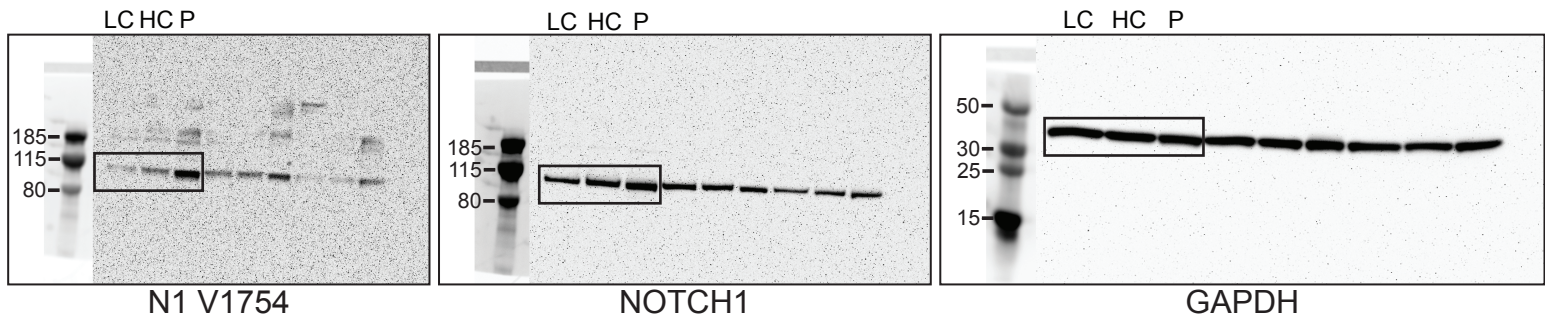**Fig. 4E**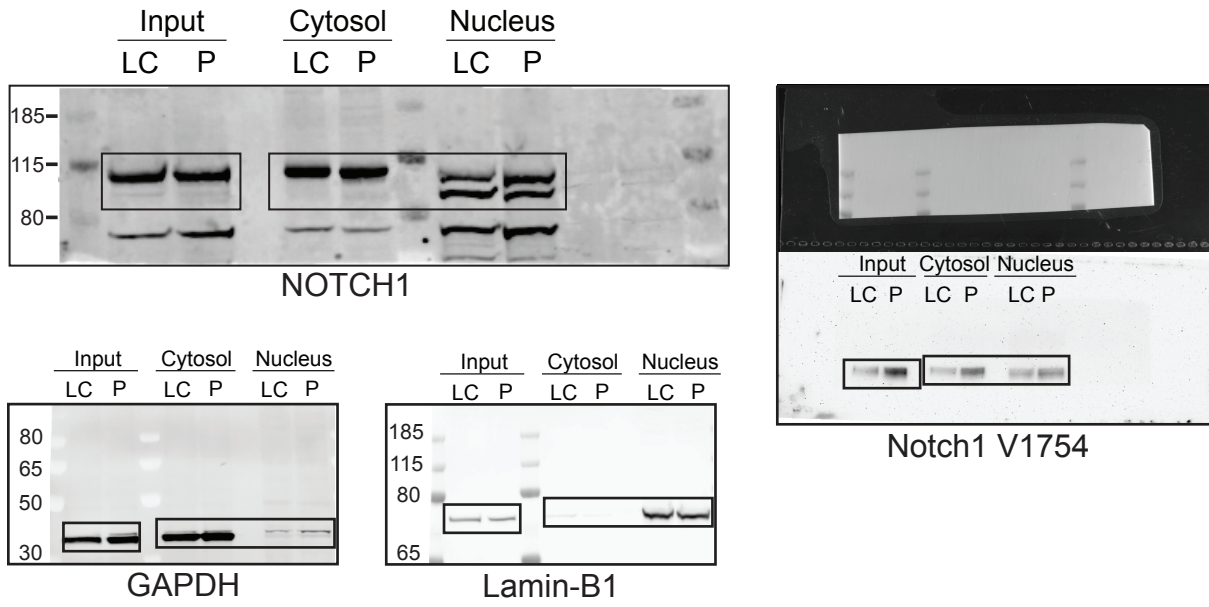**Fig. 4F**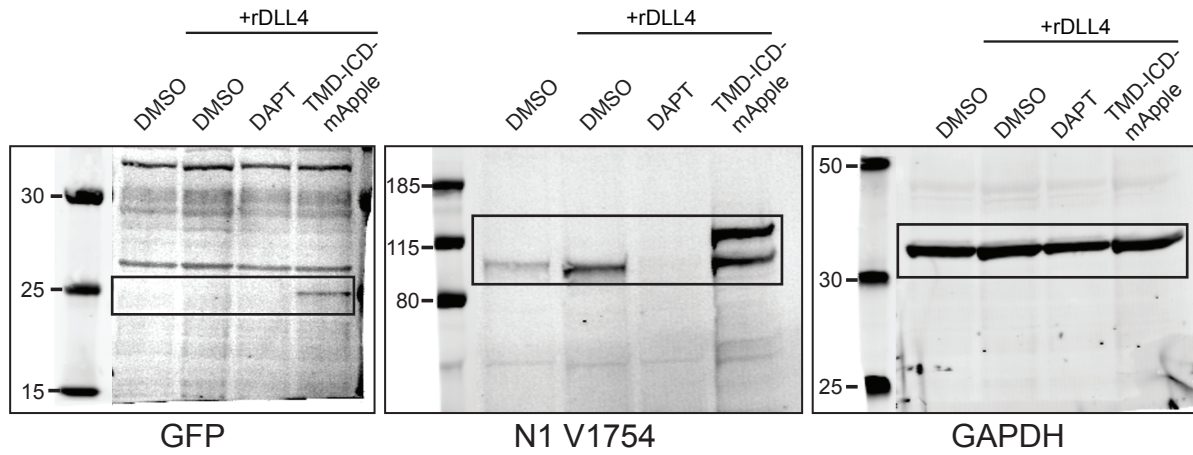

Supplement: JCB_202303013_SourceDataF4.pdf [file JCB_202303013_SourceDataF4.pdf]

**Fig. 5B**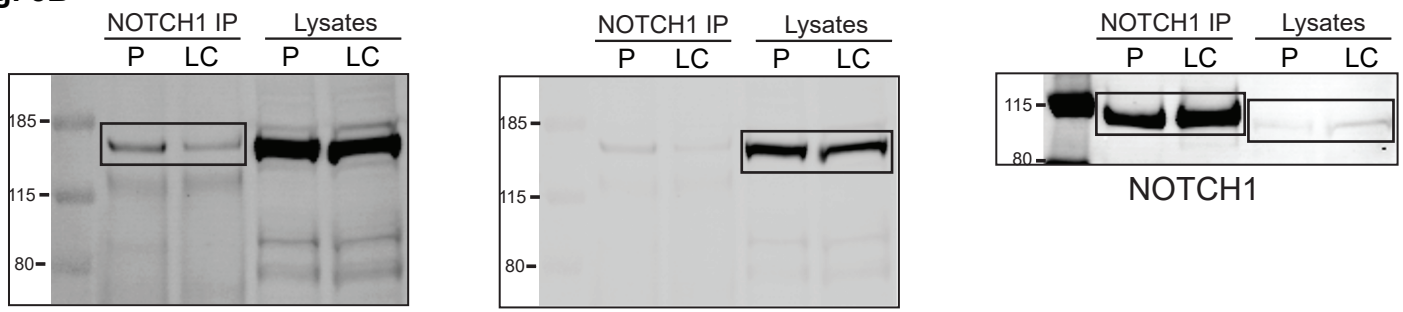

FAM83H IP brightness adjusted    FAM83H lysates brightness adjusted

**Fig. 5C**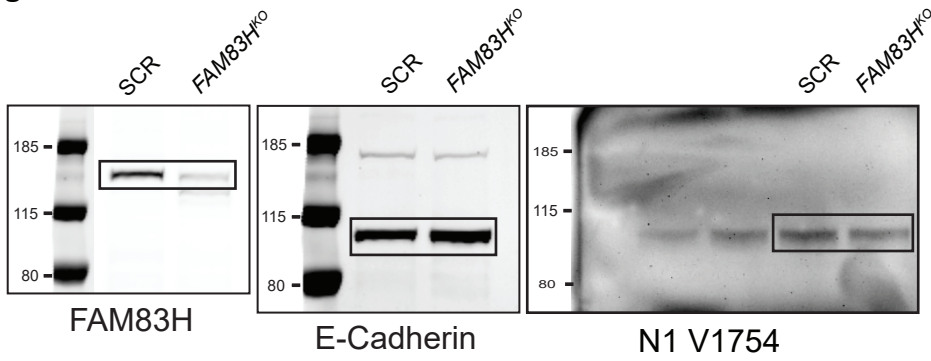**Fig. 5I**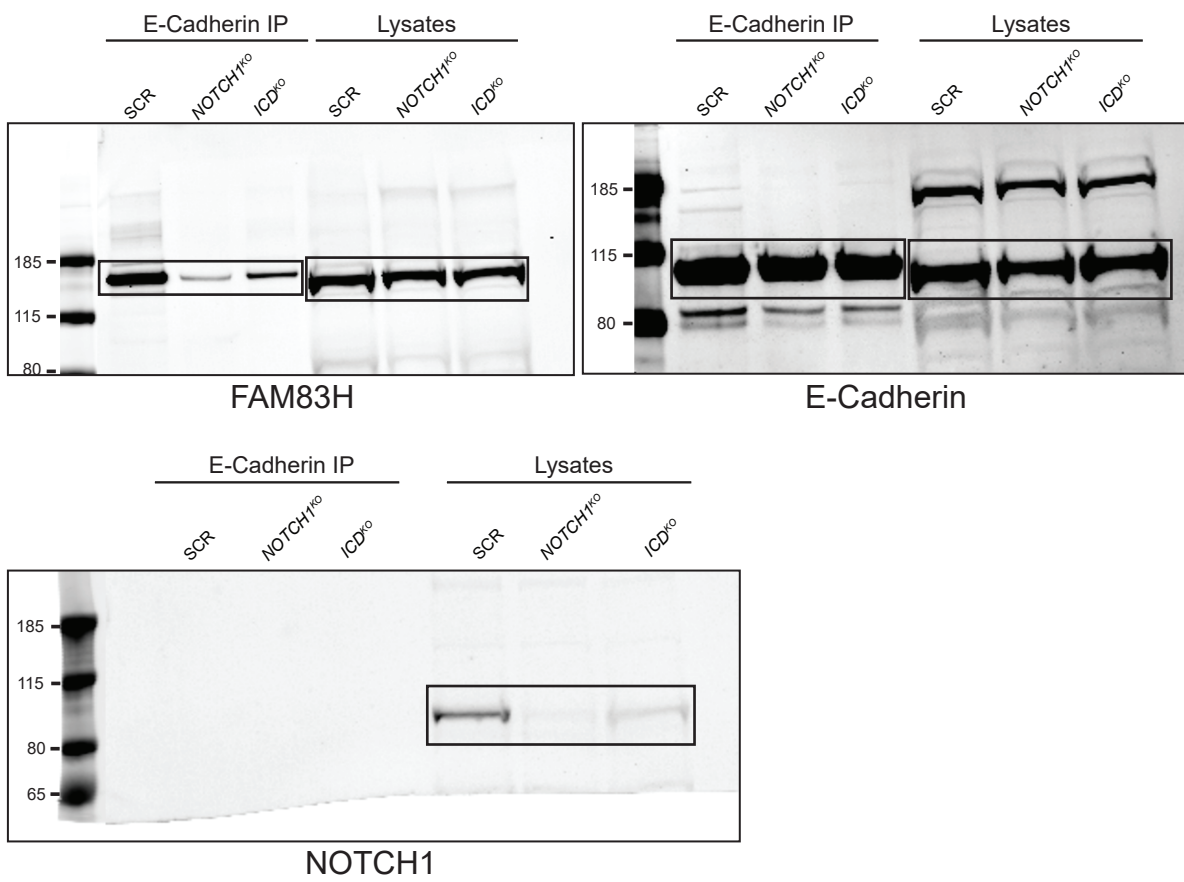**Fig. 5K**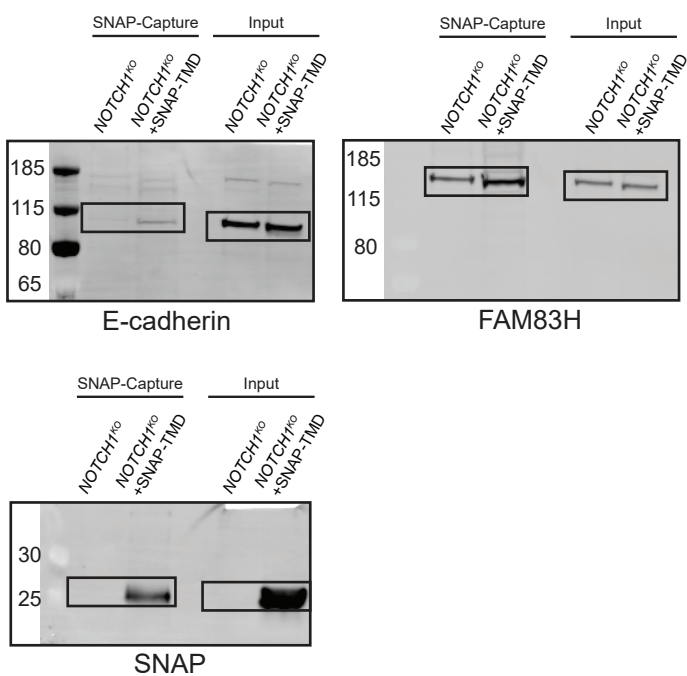**Fig. 5L**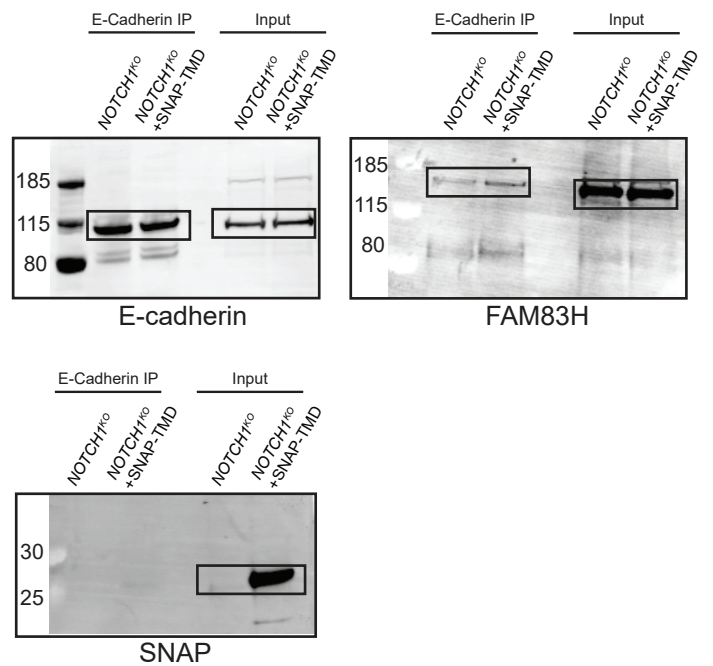

Supplement: JCB_202303013_SourceDataF5.pdf [file JCB_202303013_SourceDataF5.pdf]

# Supplemental Fig. 1A

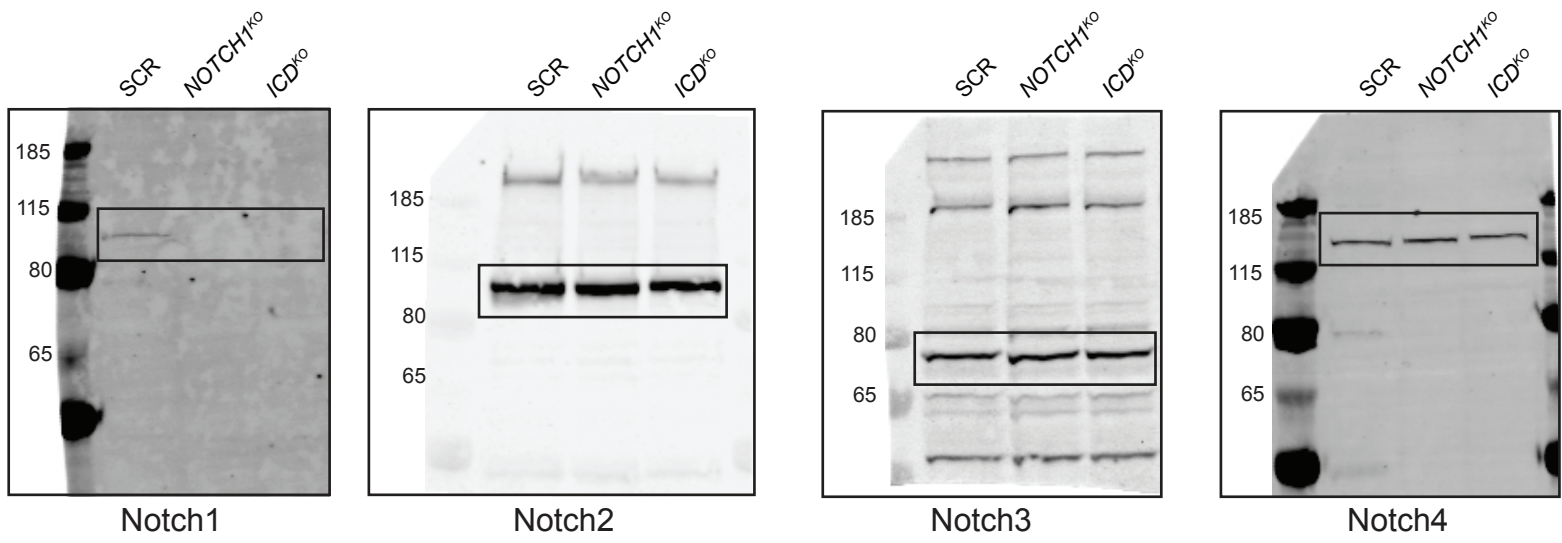

Supplement: JCB_202303013_SourceDataFS1.pdf [file JCB_202303013_SourceDataFS1.pdf]

**Supplemental Fig. 2D**

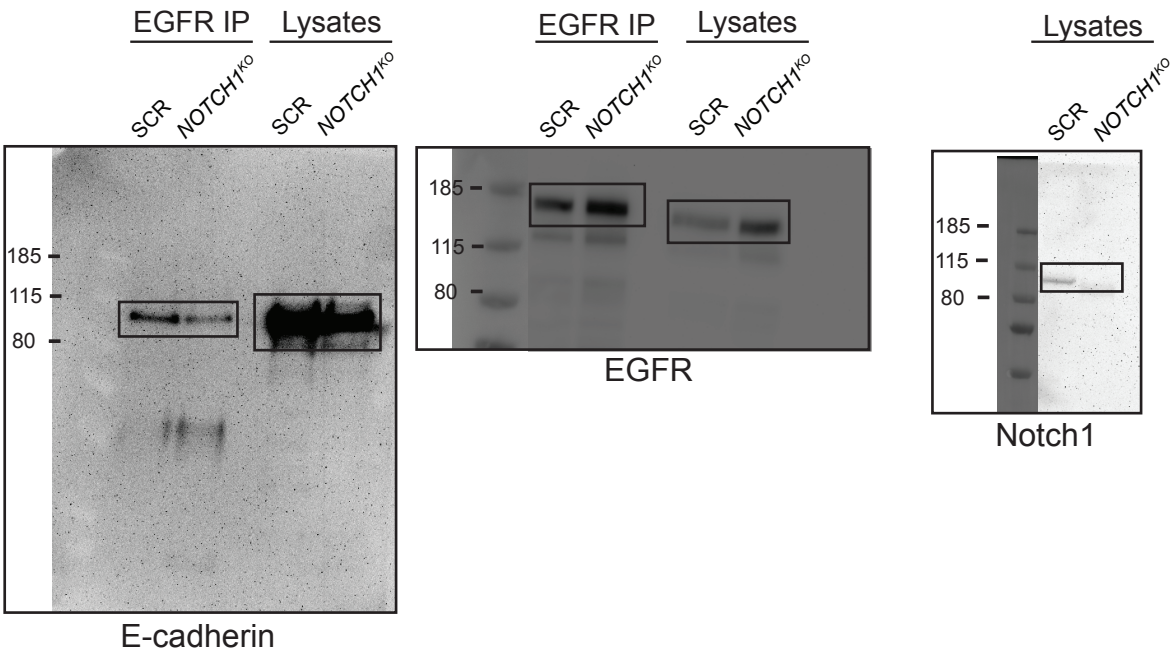

Supplement: JCB_202303013_SourceDataFS2.pdf [file JCB_202303013_SourceDataFS2.pdf]

Supplemental Fig. 5F

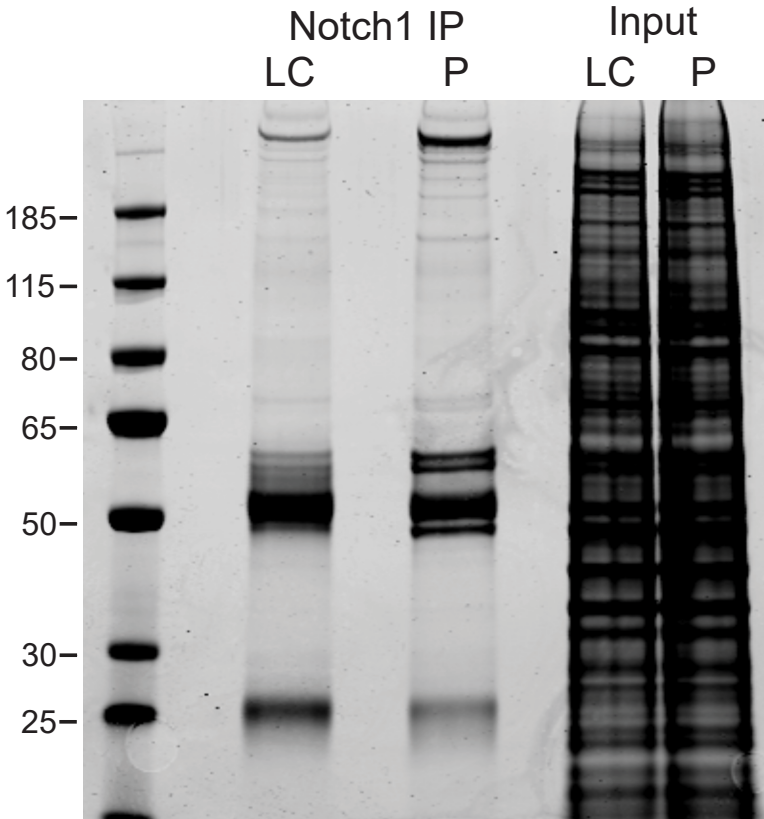

Supplement: JCB_202303013_SourceDataFS5.pdf [file JCB_202303013_SourceDataFS5.pdf]
